# THE AMERICAN JOURNAL OF PSYCHIATRY

---

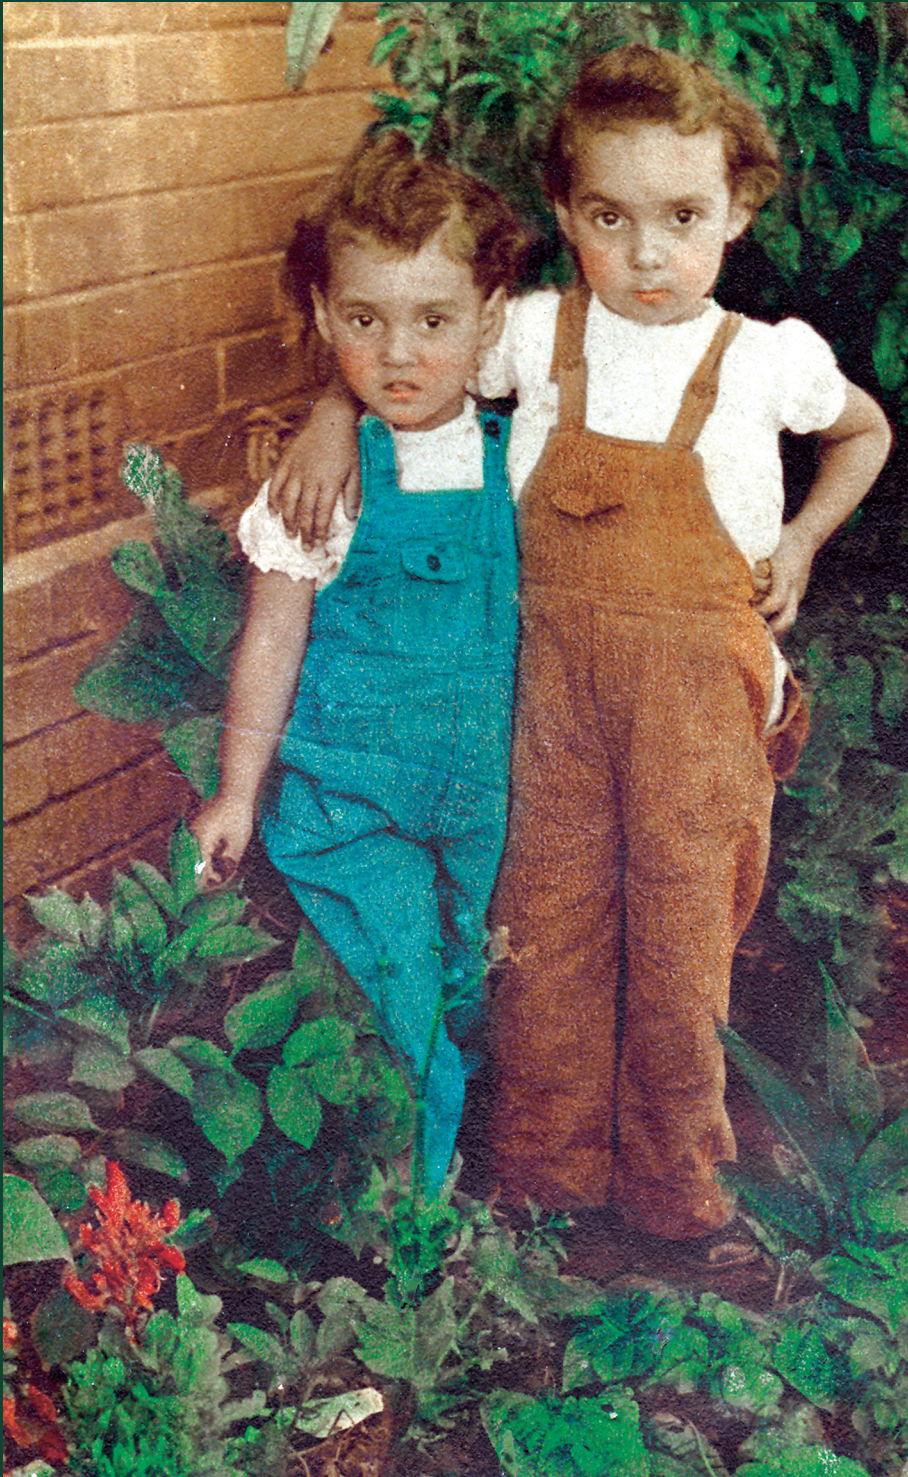

**Decline in Treatment of Pediatric Depression After FDA Advisory on Risk of Suicidality With SSRIs**

Anne M. Libby et al. 884

**Recovery From Major Depression in Older Adults Receiving Augmentation of Antidepressant Pharmacotherapy**

Mary Amanda Dew et al. 892

**Evaluating Three Treatments for Borderline Personality Disorder: A Multiwave Study**

John F. Clarkin et al. 922

◀ **Childhood Sibling Relationships as a Predictor of Major Depression in Adulthood: A 30-Year Prospective Study**

Robert J. Waldinger et al. 949

**Continuing Medical Education** 986

**June 2007**

**Volume 164 • Number 6**

---

Official Journal of the  
AMERICAN PSYCHIATRIC ASSOCIATION

---

[ajp.psychiatryonline.org](http://ajp.psychiatryonline.org)
