# THE AMERICAN JOURNAL OF PSYCHIATRY

---

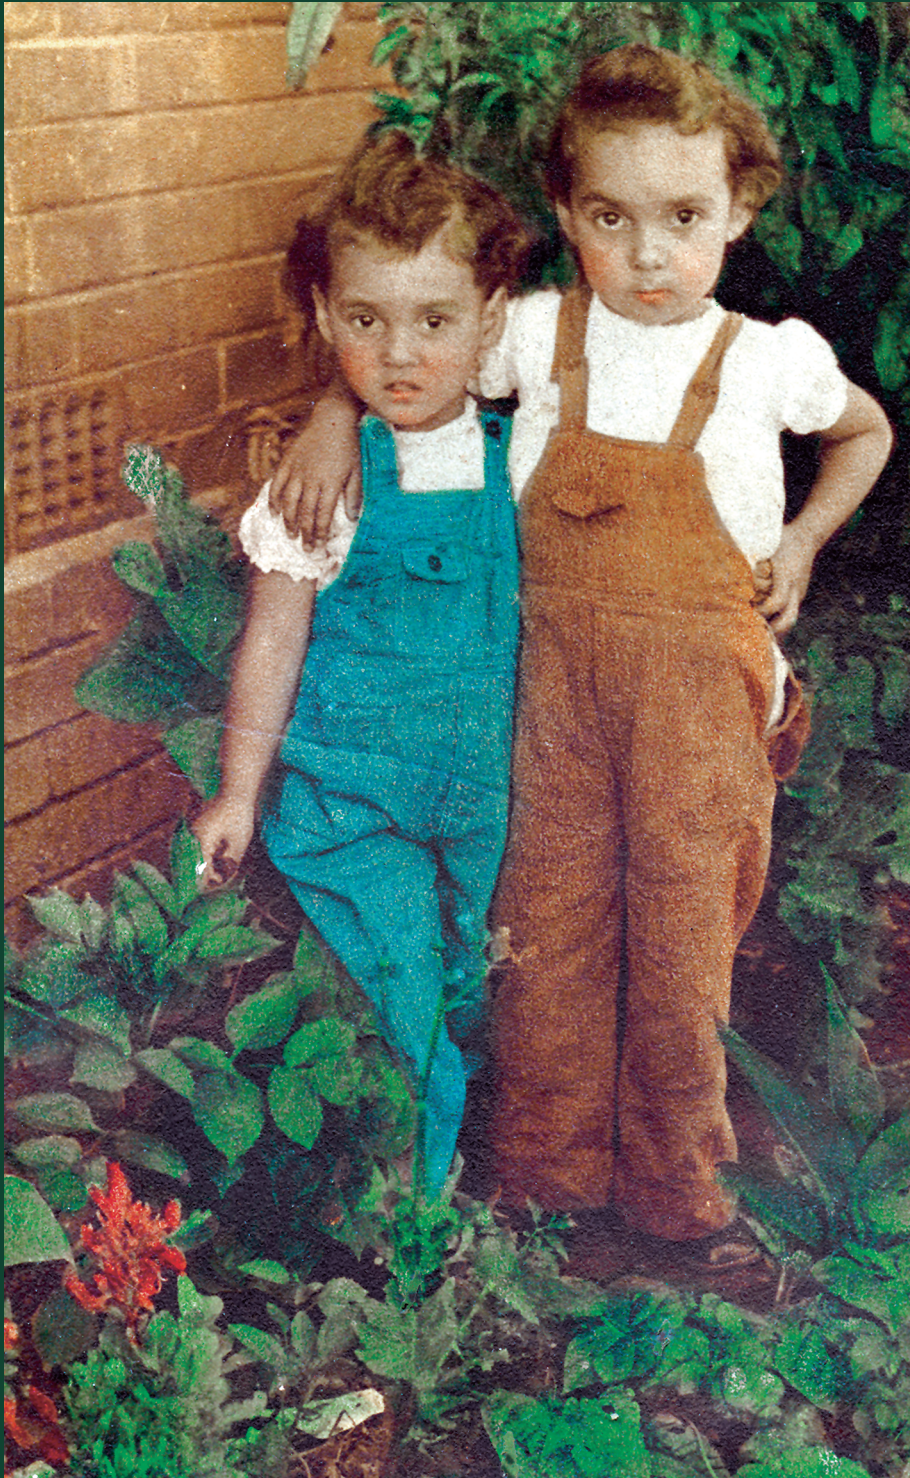

Decline in Treatment of Pediatric Depression After FDA Advisory on Risk of Suicidality With SSRIs

Anne M. Libby et al.

884

Recovery From Major Depression in Older Adults Receiving Augmentation of Antidepressant Pharmacotherapy

Mary Amanda Dew et al.

892

Evaluating Three Treatments for Borderline Personality Disorder: A Multiwave Study

John F. Clarkin et al.

922

◀ Childhood Sibling Relationships as a Predictor of Major Depression in Adulthood: A 30-Year Prospective Study

Robert J. Waldinger et al.

949

Continuing Medical Education

986

June 2007

Volume 164 • Number 6

---

Official Journal of the  
AMERICAN PSYCHIATRIC ASSOCIATION

---

[ajp.psychiatryonline.org](http://ajp.psychiatryonline.org)

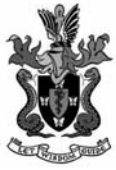

# THE BRITISH JOURNAL OF PSYCHIATRY

May 2007, VOL. 190

<http://bjp.rcpsych.org>

A16 Editorial Board

A17 Highlights of this issue

A18 Psychiatry in pictures

## EDITORIALS

371 Possibilities for the prevention and treatment of cognitive impairment and dementia

D. Burke, I. Hickie, M. Breakspear, and J. Götz

373 Prison mental health inreach services

J. Steel, G. Thornicroft, L. Birmingham, C. Brooker, A. Mills, M. Harty, and J. Shaw

## SPECIAL ARTICLE

375 Sir Martin Roth FRS. An appreciation

A. Kerr and D. Kay

## REVIEW ARTICLE

379 Chinese herbal medicine for schizophrenia. Cochrane systematic review of randomised trials

J. Rathbone, L. Zhang, M. Zhang, J. Xia, X. Liu, Y. Yang, and C.E. Adams

## PAPERS

385 Mental health of US Gulf War veterans 10 years after the war

R. Toomey, H.K. Kang, J. Karlinsky, D.G. Baker, J.J. Vasterling, R. Alpern, D.J. Reda, W.G. Henderson, F.M. Murphy, and S.A. Eisen

394 Common mental disorders and the built environment in Santiago, Chile

R. Araya, A. Montgomery, G. Rojas, R. Fritsch, J. Solis, A. Signorelli, and G. Lewis

402 Cross-national prevalence and correlates of adult attention-deficit hyperactivity disorder

J. Fayyad, R. de Graaf, R. Kessler, J. Alonso, M. Angermeyer, K. Demyttenaere, G. de Girolamo, J.M. Haro, E.G. Karam, C. Lara, J.-P. Lépine, J. Ormel, J. Posada-Villa, A.M. Zaslavsky, and R. Jin

410 Serotonergic function in children with attention-deficit hyperactivity disorder. Relationship to later antisocial personality disorder

J.D. Flory, J.H. Newcorn, C. Miller, S. Harty, and J.M. Halperin

415 Personality disorder and impaired functioning from adolescence to adulthood

A.E. Skodol, J.G. Johnson, P. Cohen, J.R. Sneed, and T.N. Crawford

421 Cognitive remediation therapy in schizophrenia. Randomised controlled trial

T. Wykes, C. Reeder, S. Landau, B. Everitt, M. Knapp, A. Patel, and R. Romeo

428 Target groups for the prevention of late-life anxiety

F. Smit, H. Comijs, R. Schoevers, P. Cuijpers, D. Deeg, and A. Beekman

435 All-cause mortality among recipients of electroconvulsive therapy. Register-based cohort study

T. Munk-Olsen, T. Munk Laursen, P. Videbech, P.B. Mortensen, and R. Rosenberg

440 Dementia Screening Questionnaire for Individuals with Intellectual Disabilities

S. Deb, M. Hare, L. Prior, and S. Bhaumik

## SHORT REPORTS

445 Foetal brain development in offspring of women with psychosis

M.C. Clarke, M. Cannon, M. Hogg, M.N. Marks, S. Conroy, S.J. Pawlby, A. Greenough, and K. Nicolaides

447 Zuclopenthixol in adults with intellectual disabilities and aggressive behaviours. Discontinuation study

F. Haessler, T. Glaser, M. Beneke, A.F. Pap, R. Bodenschatz, and O. Reis on behalf of the Zuclopenthixol Disruptive Behaviour Study Group

## COLUMNS

449 Correspondence

451 One hundred years ago

452 Book reviews

454 Contents of the *American Journal of Psychiatry*

455 Contents of *Advances in Psychiatric Treatment*

456 From the Editor's desk

# THE AMERICAN JOURNAL OF PSYCHIATRY

Official Journal of the American Psychiatric Association

## Instructions for Activating Your Online Subscription

All subscribers to the print edition of *The American Journal of Psychiatry* are automatically eligible to view the *Journal* online. The online version of the *Journal* allows you to conduct searches for topics of interest in issues going all the way back to 1844. Plus the only way readers can participate in the *Journal's* new CME Course program is to have an activated online subscription (note: there is an additional annual fee to be enrolled and eligible to receive up to 36 hours of category 1 CME credit).

To activate your online subscription:

Make sure you have your customer identification number available. This number is printed on your *Journal* mailing label, directly above your name and address. If you cannot locate this number, please contact American Psychiatric Publishing, Inc., through one of the following methods:

- e-mail: [accessnumber@psych.org](mailto:accessnumber@psych.org)
- phone: (800) 368-5777
- fax: (703) 907-1091
- mail:

American Psychiatric Publishing, Inc.  
1000 Wilson Blvd., Suite 1825  
Arlington, VA 22209-3901  
Attn: Circulation Department.

Internet: <http://www.psychiatryonline.org>. Click on the "Subscriptions" button located near the bottom of the page. Then click on the appropriate link:

- ACTIVATE Your Member or Individual (Nonmember) Subscription

For APA Members, you will find your member number on the mailing label above your name. It is

a 10-digit number beginning with zeros. Enter your number in the box and click the SUBMIT button.

For Individual Nonmembers and Institutions, your customer number is on the mailing label above your name. It is a 10-digit number beginning with 22 or 30. Enter this number in the box and click the SUBMIT button.

Fill out all the information on the next screen and press the "Send Form" button at the bottom on the right.

When finished, click the "Done" button. You will receive an e-mail confirmation that your subscription has been activated.

**Continuing Medical Education:** You now have an opportunity to earn CME credits by reading articles in *The American Journal of Psychiatry*. Three articles in each issue will each comprise a short course for up to 1 hour category 1 CME credit each. The course comprises reading the article and answering three multiple-choice questions with a single correct answer. CME Credit is issued only online. Readers who want credit must subscribe to the AJP Continuing Medical Education Course program (APA Members: \$97.00 per year; Nonmember subscribers: \$144.00 per year; nonmember nonsubscribers: \$180.00 per year). Go to [cme.psychiatryonline.org](http://cme.psychiatryonline.org), select *The American Journal of Psychiatry* at that site, take the course(s) of your choosing, complete the evaluation form, and submit your answers for CME credit. In the online course, correct answers will be highlighted for your reference; there is no minimum threshold score necessary for the credit. A link from the question to the correct answer in context will be highlighted in the associated article. A certificate for each course will be generated upon successful completion.

The American Journal of Psychiatry is online at [ajp.psychiatryonline.org](http://ajp.psychiatryonline.org)

# Psychological Medicine

Volume 37 Number 5 May 2007

## CONTENTS

|                                                                                                                                                                  |                                                                                                                                                       |                                                                                                                                                                                                                              |     |
|------------------------------------------------------------------------------------------------------------------------------------------------------------------|-------------------------------------------------------------------------------------------------------------------------------------------------------|------------------------------------------------------------------------------------------------------------------------------------------------------------------------------------------------------------------------------|-----|
| In this Issue                                                                                                                                                    | 607                                                                                                                                                   | <b>Smoking behaviour as a predictor of depression among Finnish men and women: a prospective cohort study of adult twins</b> KORHONEN, T., BROMS, U., VARJONEN, J., ROMANOV, K., KOSKENVUO, M., KINNUNEN, T., AND KAPRIO, J. | 705 |
| <b>EDITORIAL REVIEW</b>                                                                                                                                          |                                                                                                                                                       |                                                                                                                                                                                                                              |     |
| What is a mood stabilizer?                                                                                                                                       | GOODWIN, G.M. AND MALHI, G.S.                                                                                                                         |                                                                                                                                                                                                                              | 609 |
| <b>REVIEW ARTICLE</b>                                                                                                                                            |                                                                                                                                                       |                                                                                                                                                                                                                              |     |
| Genetic influences on measures of the environment: a systematic review                                                                                           | KENDLER, K.S. AND BAKER, J.H.                                                                                                                         |                                                                                                                                                                                                                              | 615 |
| <b>ORIGINAL ARTICLES</b>                                                                                                                                         |                                                                                                                                                       |                                                                                                                                                                                                                              |     |
| Puberty moderates genetic influences on disordered eating                                                                                                        | KLUMP, K.L., PERKINS, P.S., BURT, S.A., MCGUE, M., AND IACONO, W.G.                                                                                   |                                                                                                                                                                                                                              | 627 |
| Shared genetic and environmental risk factors between undue influence of body shape and weight on self-evaluation and dimensions of perfectionism                | WADE, T.D., AND BULIK, C.M.                                                                                                                           |                                                                                                                                                                                                                              | 635 |
| Genetic and environmental influences on dimensional representations of DSM-IV cluster C personality disorders: a population-based multivariate twin study        | REICHBORN-KJENNERUD, T., CZAJKOWSKI, N., NEALE, M.C., ØRSTAVIK, R.E., TORGENSEN, S., TAMBS, K., RØYSAMB, E., HARRIS, J.R., AND KENDLER, K.S.          |                                                                                                                                                                                                                              | 645 |
| The heritability of cluster A personality disorders assessed both by personal interview and questionnaire                                                        | KENDLER, K.S., MYERS, J., TORGENSEN, S., NEALE, M.C., AND REICHBORN-KJENNERUD, T.                                                                     |                                                                                                                                                                                                                              | 655 |
| Genetic overlap between bipolar illness and event-related potentials                                                                                             | HALL, M.-H., RIJSDIJK, F., KALIDINDI, S., SCHULZE, K., KRAVARITI, E., KANE, F., SHAM, P., BRAMON, E., AND MURRAY, R.M.                                |                                                                                                                                                                                                                              | 667 |
| Cognitive functioning in patients with familial bipolar I disorder and their unaffected relatives                                                                | ANTILA, M., TUULIO-HENRIKSSON, A., KIESEPPÄ, T., EEROLA, M., PARTONEN, T., AND LÖNNQVIST, J.                                                          |                                                                                                                                                                                                                              | 679 |
| A prospective study of dysfunctional thinking and the regulation of negative intrusive memories in bipolar I disorder: implications for affect regulation theory | TZEMOU, E., AND BIRCHWOOD, M.                                                                                                                         |                                                                                                                                                                                                                              | 689 |
| Corpus callosum areas in first-episode patients with bipolar disorder                                                                                            | ATMACA, M., OZDEMIR, H., AND YILDIRIM, H.                                                                                                             |                                                                                                                                                                                                                              | 699 |
| Predictors of compliance with psychological interventions offered in the community                                                                               | AYUSO-MATEOS, J.L., PEREDA, A., DUNN, G., VAZQUEZ-BARQUERO, J.L., CASEY, P., LEHTINEN, V., DALGARD, O., WILKINSON, G., AND DOWRICK, C.                |                                                                                                                                                                                                                              | 717 |
| Quality of life as an outcome indicator in patients with seasonal affective disorder: results from the Can-SAD study                                             | MICHALAK, E.E., MURRAY, G., LEVITT, A.J., LEVITAN, R. D., ENNS, M.W., MOREHOUSE, R., TAM, E.M., CHEUNG, A., AND LAM, R.W.                             |                                                                                                                                                                                                                              | 727 |
| Development of a new measure of health-related quality of life for people with dementia: DEMQOL                                                                  | SMITH, S.C., LAMPING, D.L., BANERJEE, S., HARWOOD, R.H., FOLEY, B., SMITH, P., COOK, J.C., MURRAY, J., PRINCE, M., LEVIN, E., MANN, A., AND KNAPP, M. |                                                                                                                                                                                                                              | 737 |
| Differentiation between mild cognitive impairment, Alzheimer's disease and depression by means of cued recall                                                    | DIERCKX, E., ENGELBORGH, S., DE RAEDT, R., DE DEYN, P.P., AND PONJAERT-KRISTOFFERSEN, I.                                                              |                                                                                                                                                                                                                              | 747 |
| <b>BOOK REVIEWS</b>                                                                                                                                              |                                                                                                                                                       |                                                                                                                                                                                                                              |     |
| <i>The God Delusion</i>                                                                                                                                          | GEANEY, D.                                                                                                                                            |                                                                                                                                                                                                                              | 757 |
| <i>Psychiatry in the Scientific Image</i>                                                                                                                        | ZACHAR, P.                                                                                                                                            |                                                                                                                                                                                                                              | 758 |
| <i>Clinical Psychology for Trainees: Foundations of Science-informed Practice</i>                                                                                | GREENAWAY, R.                                                                                                                                         |                                                                                                                                                                                                                              | 759 |
| <i>By Their Own Young Hand: Deliberate Self-harm and Suicidal Ideas in Adolescents</i>                                                                           | JAFFA, T.                                                                                                                                             |                                                                                                                                                                                                                              | 760 |
| <i>Melancholia. The Diagnosis, Pathophysiology, and Treatment of Depressive Illness</i>                                                                          | HUNT, N.                                                                                                                                              |                                                                                                                                                                                                                              | 761 |
| <i>Corrigendum</i>                                                                                                                                               |                                                                                                                                                       |                                                                                                                                                                                                                              | 763 |
| <i>American Journal of Psychiatry Contents January 2007</i>                                                                                                      |                                                                                                                                                       |                                                                                                                                                                                                                              | 765 |
